# Childhood immune imprinting to influenza A shapes birth year-specific risk during seasonal H1N1 and H3N2 epidemics

Katelyn M Gostic<sup>1</sup>, Rebecca Bridge<sup>2</sup>, Shane Brady<sup>2</sup>, Cécile Viboud<sup>3</sup>, Michael Worobey<sup>4</sup>, and James O Lloyd-Smith<sup>1,3\*</sup>

<sup>1</sup>Dept. of Ecology and Evolutionary Biology, University of California, Los Angeles, Los Angeles, CA, USA

<sup>2</sup>Arizona Department of Health Services, Phoenix AZ, USA

<sup>3</sup>Fogarty International Center, National Institutes of Health, Bethesda, MD, USA

<sup>4</sup>Dept. of Ecology and Evolutionary Biology, University of Arizona, Tucson, AZ, USA

†Current address: Dept. of Ecology and Evolution, University of Chicago, Chicago, IL, USA

\* [jlloydsmith@ucla.edu](mailto:jlloydsmith@ucla.edu)

## Abstract

Across decades of co-circulation in humans, influenza A subtypes H1N1 and H3N2 have caused seasonal epidemics characterized by different age distributions of cases and mortality. H3N2 causes the majority of relatively severe, clinically attended cases in high-risk elderly cohorts, and the majority of overall deaths, whereas H1N1 causes fewer deaths overall, and cases shifted towards young and middle-aged adults. These contrasting age profiles may result from differences in childhood exposure to H1N1 and H3N2 or from differences in evolutionary rate between subtypes. Here we analyze a large epidemiological surveillance dataset to test whether childhood immune imprinting shapes seasonal influenza epidemiology, and if so, whether it acts primarily via immune memory of a particular influenza subtype or via broader immune memory that protects across subtypes. We also test the impact of evolutionary differences between influenza subtypes on age distributions of cases. Likelihood-based model comparison shows that narrow, within-subtype imprinting shapes seasonal influenza risk alongside age-specific risk factors. The data do not support a strong effect of evolutionary rate, or of broadly protective imprinting that acts across subtypes. Our findings emphasize that childhood exposures can imprint a lifelong immunological bias toward particular influenza subtypes, and that these cohort-specific biases shape epidemic age distributions. As a result, newer and less “senior” antibody responses acquired later in life do not provide the same strength of protection as responses imprinted in childhood. Finally, we project that the relatively low mortality burden of H1N1 may increase in the coming decades, as cohorts that lack H1N1-specific imprinting eventually reach old age.

41

## Author Summary

42           Influenza viruses of subtype H1N1 and H3N2 both cause seasonal epidemics in humans, but with  
43 different age-specific impacts. H3N2 causes a greater proportion of cases in older adults than H1N1, and  
44 more deaths overall. People tend to gain the strongest immune memory of influenza viruses encountered  
45 in childhood, and so differences in H1N1 and H3N2's age-specific impacts may reflect that individuals  
46 born in different eras of influenza circulation have been imprinted with different immunological risk  
47 profiles. Another idea is that H3N2 may be more able to infect immunologically experienced adults  
48 because it evolves slightly faster than H1N1 and can more quickly escape immune memory. We analyzed  
49 a large epidemiological data set and found the clearest signal that birth year-specific differences in  
50 childhood immune imprinting, not differences in evolutionary rate, explain differences in H1N1 and  
51 H3N2's age-specific impacts. These results can help epidemiologists understand how epidemic risk from  
52 specific influenza subtypes is distributed across the population and predict how population risk may shift  
53 as differently imprinted birth years grow older. Further, these results provide immunological clues to  
54 which facets of immune memory become biased in childhood, and then later play a strong role in  
55 protection during seasonal influenza epidemics.

56

## Introduction

57 Childhood influenza exposures leave an immunological imprint, which has reverberating, lifelong  
58 impacts on immune memory. Foundational work on original antigenic sin (1) and antigenic seniority (2)  
59 showed that individuals maintain the highest antibody titers against influenza strains encountered in  
60 childhood. But how these serological patterns map to functional immune protection, and shape birth year-  
61 specific risk during outbreaks, remains an active area of inquiry. One open question is the breadth of  
62 cross-protection provided by immune memory imprinted in childhood.

63 We define immune imprinting as a lifelong bias in immune memory of, and protection against,  
64 the strains encountered in childhood. Such biases most likely become entrenched as subsequent exposures  
65 back-boost existing memory responses, rather than stimulating true *de novo* responses (3). By providing  
66 particularly robust protection against certain antigenic subtypes, or clades, imprinting can provide  
67 immunological benefits, but perhaps at the cost of equally strong protection against variants encountered  
68 later in life. For example, every modern influenza pandemic has spared certain birth cohorts, presumably  
69 due to cross-protective memory primed in childhood (4–10). Recently, we showed that imprinting also  
70 protects against novel, emerging avian influenza viruses of the same phylogenetic group as the first  
71 childhood exposure (9,11). Imprinting may additionally shape birth year-specific risk from seasonal  
72 influenza (12–14), but the importance of broadly protective immunity remains unclear in this context.

73 Until recently, narrow cross-protective immunity specific to variants of a single hemagglutinin  
74 (HA) subtype has been considered the primary mode of defense against seasonal influenza. Lymphocyte  
75 memory of variable epitopes on the HA head (i.e. sites at which hemagglutinin antigens of different  
76 subtypes show limited homology) drives this narrow, within-subtype protection, which is the main  
77 mechanism of protection from the inactivated influenza vaccine. But a growing body of evidence shows  
78 protection may also be driven by memory of other influenza antigens (e.g. neuraminidase, NA) (15–17),  
79 or by immune response to conserved epitopes, many of which are found on the HA stalk (11,18–21).  
80 (Antibodies that target conserved HA epitopes can provide broad protection across multiple HA subtypes

81 in the same phylogenetic group (18,20,22), where HA group 1 contains hemagglutinin subtypes H1 and  
82 H2, while group 2 contains H3 (11,19,23). H1, H2 and H3 are the only HA subtypes that have circulated  
83 seasonally in humans since 1918.)

84 Together, these insights suggest that within a single host, imprinting probably induces multiple  
85 levels of bias in immune memory, to both conserved (broadly protective) and variable (narrowly  
86 protective) sites on various influenza antigens. The functional role of any single layer of imprinted  
87 immune memory depends on both immunodominance hierarchies and epidemic context. Here, we  
88 examine which layers of imprinted memory impact risk from seasonal influenza.

89 Within-subtype immunity to HA is known to shape seasonal influenza's epidemiology and  
90 evolution (24). But because this type of narrow immunity decays rapidly in the face of antigenic drift, it  
91 would not be expected to shape cohort-specific imprinting protection across an entire human lifetime  
92 (25,26). Conversely, broad, HA group-level immune memory arises when lymphocytes target conserved  
93 HA epitopes. Responses to these conserved epitopes should be stable over time, and can play a strong  
94 role in defense against unfamiliar influenza strains (e.g. novel, avian or pandemic subtypes  
95 (11,18,20,22,27,28)). Broad, HA group-level responses are not traditionally thought to play a strong role  
96 in defense against familiar, seasonal influenza subtypes, but have recently been identified as an  
97 independent correlate of protection against seasonal influenza (21), and might play a particularly strong  
98 role against drifted seasonal strains whose variable HA epitopes have become unrecognizable. Thus,  
99 childhood immune imprinting may determine which birth cohorts are primed for effective defense against  
100 seasonal strains with conserved HA epitopes characteristic of group 1 or group 2, or with variable HA  
101 epitopes characteristic of a particular subtype (H1, H2, etc.). A similar line of reasoning may apply to  
102 immunity against NA, although much less attention has been paid to this antigen.

103 Since 1977, two distinct subtypes of influenza A, H1N1 and H3N2, have circulated seasonally in  
104 humans, with striking but poorly understood differences in their age-specific impact (9,12–14,29). These  
105 differences could be associated with childhood imprinting: older cohorts were almost certainly exposed to  
106 H1N1 in childhood (since it was the only subtype circulating in humans from 1918-1957), and now seem

107 to be preferentially protected against modern seasonal H1N1 variants (9,12–14). Likewise, younger adults  
108 have the highest probabilities of childhood imprinting to H3N2 (*Fig. 1*), which is consistent with  
109 relatively low numbers of clinically attended H3N2 cases in these cohorts. Alternatively, differences in  
110 the evolutionary dynamics of H1N1 and H3N2 could explain the observed age profiles. Subtype H3N2  
111 exhibits slightly faster drift in its antigenic phenotype than H1N1, and as a result, H3N2 may be better  
112 able to escape pre-existing immunity in immunologically experienced adults, whereas H1N1 may be  
113 relatively restricted to causing cases in immunologically inexperienced children (30).

114 We analyzed a large surveillance data set of relatively severe, clinically attended influenza cases  
115 to test whether cohort effects from childhood imprinting primarily act against variable epitopes, only  
116 providing narrow cross-protection against closely related HA or NA variants of the same subtype, or  
117 against more conserved epitopes, providing broad cross-protection across HA subtypes in the same  
118 phylogenetic group (*Fig. 1A-B*). We fitted a suite of models to data using maximum likelihood and  
119 compared models using AIC. In a separate analysis, we considered the hypothesis that differences in  
120 evolutionary rate of H1N1 and H3N2, rather than imprinting effects, shape differences in age distribution.  
121 Our results have implications for long-term projections of seasonal influenza risk in elderly cohorts (13),  
122 who suffer the heaviest burdens of influenza-related morbidity and mortality, and whose imprinting status  
123 will shift through time as cohorts born during different inter-pandemic eras grow older.

124

## 125 **The Data**

126 The Arizona Department of Health Services (ADHS) provided a dataset containing 9,510  
127 seasonal H1N1 and H3N2 cases from their statewide surveillance system. Cases of all ages were  
128 confirmed to subtype by PCR and/or culture, primarily from virologic testing at the Arizona State Public  
129 Health Laboratory (ASPHL). The ADHS surveillance system aims to characterize circulating strains from  
130 patients across the state with medically attended influenza. Although surveillance does not target specific  
131 at-risk groups, relatively severe cases (especially those tested at hospital labs) are overrepresented in our

132 data, as these cases are most likely to be medically attended and confirmed to subtype, thus meeting our  
133 study inclusion criteria. This is because confirmation to subtype requires a second-line test (PCR or  
134 culture); rapid tests are more common, but do not indicate subtype.

135         Although the exact collection setting of individual specimens was not always recorded, ADHS  
136 staff internally reviewed reporting source and provider organization of cases in our data to estimate that  
137 roughly 76% were reported and/or submitted by hospital labs or may have originated at hospital-  
138 associated outpatient clinics. A previous ADHS analysis of subtyped 2016 influenza A data matched to  
139 hospital discharge data found that nearly half of cases reported from hospital labs (if extrapolated to other  
140 seasons, roughly 38% of the overall data) were severe enough to warrant hospital admission. The rest  
141 (also roughly 38% of the overall data, if extrapolated) were discharged without admission. To obtain a  
142 broader representation of clinically attended cases from across the state, ADHS collaborates with county  
143 health departments, commercial laboratories, and outpatient clinics to receive specimens. We estimate  
144 that roughly 8% of the data originated in outpatient settings. The remaining 17% of cases were either  
145 tested at commercial labs, or were tested at ASPHL, but with unknown origin. Ultimately, these data  
146 allow us to analyze drivers of relatively severe, clinically attended cases, but our results cannot be  
147 assumed to generalize to mild or asymptomatic cases.

148         Cases were observed across 22 years of influenza surveillance, from the 1993-1994 influenza  
149 season through the 2014-2015 season, although sample sizes increased dramatically after the 2009  
150 pandemic (*Table 1*). Sampling changed slightly starting in 2004, when commercial labs were first  
151 mandated to report positive tests to the state (31), but the vast majority of cases analyzed (9150/9451)  
152 were observed from the 2004-2005 season onwards, after this change had been implemented.

153         Following CDC standards, ADHS defines the influenza season as epidemiological week 40  
154 (around early October) through week 39 of the following year (32). The 2008-2009 and 2009-2010  
155 influenza seasons spanned the first and second wave, respectively, of the 2009 H1N1 pandemic. We did  
156 not analyze cases observed during this time period, because age distributions of cases and molecular

157 drivers of immune memory differed during the 2009 pandemic from the normal drivers of seasonal  
158 influenza's immuno-epidemiology of interest to this study (14,18,22). From the dataset of 9,510 seasonal  
159 cases (defined as any case observed outside the 2008-2009 or 2009-2010 season), we excluded 58 cases  
160 with birth years before 1918 (whose imprinting status could not be inferred unambiguously), and one case  
161 whose year of birth was recorded in error. Ultimately, we analyzed 9,541 cases.

162  
163  
164  
165  
166  
167  
168  
169  
170  
171  
172

**Table 1.**

| <b>Season</b> | <b>Confirmed H1N1</b> | <b>Confirmed H3N2</b> |
|---------------|-----------------------|-----------------------|
| 1993-94       | 0                     | 101                   |
| 1994-95       | 12                    | 38                    |
| 2002-03       | 71                    | 8                     |
| 2003-04       | 0                     | 71                    |
| 2004-05       | 0                     | 131                   |
| 2005-06       | 1                     | 321                   |
| 2006-07       | 212                   | 28                    |
| 2007-08       | 196                   | 244                   |
| 2010-11       | 472                   | 1204                  |
| 2011-12       | 595                   | 348                   |
| 2012-13       | 80                    | 1578                  |
| 2013-14       | 1475                  | 151                   |
| 2014-15       | 5                     | 2109                  |
| <b>Total</b>  | <b>3119</b>           | <b>6332</b>           |

173 **Confirmed cases in surveillance data from Arizona Department of Health Services.** Data  
174 representing the first and second waves of the 2009 H1N1 pandemic (2008-2009 and 2009-  
175 2010 seasons) were excluded.

176  
177  
178

179

## The Model

### 180 Reconstructed imprinting patterns

181 We reconstructed birth year-specific probabilities of childhood imprinting to H1N1, H2N2 or  
182 H3N2 using methods described previously (11). These probabilities are based on patterns of first  
183 childhood exposure to influenza A and reflect historical circulation (*Fig. 1A*). Most individuals born  
184 between pandemics in 1918 and 1957 experienced a first influenza A virus (IAV) infection by H1N1, and  
185 middle-aged cohorts born between pandemics in 1957 and 1968 almost all were first infected by H2N2  
186 (note that because the first influenza exposure may occur after the first year of life, individuals born in the  
187 years leading up to a pandemic have some probability of first infection by the new pandemic subtype,  
188 *Fig. 1A*). Ever since its emergence in 1968, H3N2 has dominated seasonal circulation in humans, and  
189 caused the majority of first infections in younger cohorts. However, H1N1 has also caused some seasonal  
190 circulation since 1977, and has imprinted a fraction of all cohorts born since the mid-1970s (*Fig. 1A*).

191 Reconstructions assumed children age 0-12 in the year of case observation might not yet have  
192 been exposed to any influenza virus. Interactions between imprinting and vaccination of naïve infants are  
193 plausible, but poorly understood (11,33). We did not consider childhood vaccination effects here; only a  
194 small percentage of individuals in the ADHS data were born at a time when healthy infants were routinely  
195 vaccinated against influenza.

196

197

### 198 Expected age distributions under alternate imprinting models

199 If HA subtype-level imprinting protection shapes seasonal influenza risk, primary exposure to  
200 HA subtype H1 or H3 in childhood should provide lifelong protection against modern variants of the  
201 same HA subtype. If imprinting protection acts primarily against specific NA subtypes, lifelong  
202 protection will be specific to N1 or to N2 (*Fig. 1B*). Alternatively, if broad HA group-level imprinting  
203 shapes seasonal influenza risk, then cohorts imprinted to HA subtype H1 or H2 (both group 1) should be



204 protected against modern, seasonal H1N1 (also group 1), while only cohorts imprinted to H3 (group 2)  
205 would be protected against modern, seasonal H3N2 (also group 2) (*Fig. 1B*). Collinearities between the  
206 predictions of different imprinting models (*Fig. 1D-I*) were inevitable, given the limited diversity of  
207 influenza antigenic subtypes circulating in humans over the past century (reflected in *Fig. 1A*). Note that  
208 middle-aged cohorts, which were first infected by H2N2, are crucial, because they provide the only  
209 leverage to differentiate between imprinting at the HA subtype, NA subtype or HA group-level level (*Fig.*  
210 *1B*).

211 Our approach distinguishes between age-specific risk factors related to health and social  
212 behavior, and birth year-specific effects related to imprinting. Specifically, age-specific risk could be  
213 influenced by medical factors like age-specific vaccine coverage, age-specific risk of severe disease, age-  
214 related changes in endocrinology and immunosenescence, or by behavioral factors like age-assorted  
215 social mixing, and age-specific healthcare seeking behavior. These factors should have similar impacts on  
216 any influenza subtype. In contrast, imprinting effects are subtype-specific. Thus, we fit a step function to  
217 characterize the shape of age-specific risk of any confirmed influenza case. Simultaneously, we modeled  
218 residual, subtype-specific differences in risk as a function of birth year, to focus on the possible role of  
219 childhood imprinting. Each tested model used a linear combination of age-specific risk (*Fig. 1C*) and  
220 birth year-specific risk (*Fig. 1D-F*) to generate an expected distribution of H1N1 or H3N2 cases (*Fig.*  
221 *1G-I*). Note that for a given birth cohort, age-specific risk changed across progressive years of case  
222 observation (as the cohort got older), whereas birth year-specific risk was constant over time.

223 To test quantitatively whether observed subtype-specific differences in incidence were most  
224 consistent with imprinting at the HA subtype, NA subtype or HA group level, or with no contribution of  
225 imprinting, we fitted a suite of models to each data set using a multinomial likelihood and then performed  
226 model selection using AIC. AIC is used to compare the relative strength of statistical support for a set of  
227 candidate models, each fitted to the same data, and favors parsimonious models that fit the data well  
228 (34,35). Technical details are provided in the *Methods*.

229

## 230 **Tested models**

231 We fit a set of four models to the ADHS data set. The simplest model contained only age-specific  
232 risk (abbreviated A), and more complex models added effects from imprinting at the HA subtype level  
233 (S), at the HA group level (G), or at the NA subtype level (N): abbreviated AS, AG, and AN,  
234 respectively. The age-specific risk curve took the form of a step function, in which relative risk was fixed  
235 to 1 in age bin 0-4, and one free parameter was fit to represent relative risk in each of the following 12  
236 age bins: {5-10, 11-17, 18-24, 25-31, 32-38, 39-45, 46-52, 53-59, 60-66, 67-73, 74-80, 81+}. Within  
237 models that contained imprinting effects, the fraction of individuals in each single year of birth with  
238 protective childhood imprinting was assumed proportional to reductions in risk. Two additional free  
239 parameters quantified the relative risk of a confirmed H1N1 or H3N2 case, given imprinting protection  
240 against that seasonal subtype.

241

## 242 **Effect of influenza evolutionary rate on age profiles**

243 We used publicly available data from *Nextstrain* (36,37), and from one previously published  
244 study (38), to calculate annual antigenic advance, which we defined as the antigenic distance between  
245 strains of a given lineage (pre-2009 H1N1, post-2009 H1N1 or H3N2) that circulated in consecutive  
246 seasons (*Methods*). The “antigenic distance” between two influenza strains is used as a proxy for  
247 similarity in antigenic phenotype, and potential for immune cross-protection. A variety of methods have  
248 been developed to estimate antigenic distance using serological data, genetic data, or both (37–39).

249 To assess the impact of antigenic evolutionary rate on the epidemic age distribution, we tested  
250 whether the proportion of cases in children increased in seasons associated with large antigenic changes.  
251 If the rate of antigenic drift is a strong driver of age-specific influenza risk, then the fraction of influenza  
252 cases observed in children should be negatively related to annual antigenic advance (30). In other words,  
253 strains that have not changed much antigenically since the previous season should be unable to escape  
254 pre-existing immunity in immunologically experienced adults, and more restricted to causing cases in

255 immunologically inexperienced children; strains that have changed substantially will be less restricted to  
256 children.

257

## 258 **Results**

### 259 ***Subtype-specific differences in age distribution***

260 Seasonal H3N2 epidemics consistently caused more clinically attended cases in older cohorts,  
261 while H1N1 caused a greater proportion of cases in young and middle-aged adults (*Figs. 2, S1-S2*). These  
262 patterns were apparent whether we compared H3N2 epidemic age distributions with those caused by the  
263 pre-2009 seasonal H1N1 lineage, or with the post-2009 lineage. Observed patterns are consistent with the  
264 predicted effects of cohort-specific imprinting (*Fig. 1*), and with previously reported differences in age  
265 distribution of seasonal H1N1 and H3N2 incidence (12–14,29). See *Fig. 2* for seasons where H1N1 and  
266 H3N2 co-circulated in substantial numbers, and *Figs. S1-S2* for the entire dataset and alternate smoothing  
267 parameters.

268

### 269 **Imprinting model selection**

270 The data showed a strong preference for NA subtype-level imprinting over HA subtype-level  
271 imprinting ( $\Delta\text{AIC}=34.54$ ), and effectively no statistical support for broad, HA group-level imprinting  
272 ( $\Delta\text{AIC}=249.06$ ), or for an absence of imprinting effects ( $\Delta\text{AIC}=385.42$ ) (*Fig. 3, Table 2*). Visual  
273 assessment of model fits (*Fig. 3C-D*) confirmed that models containing imprinting effects at the narrow,  
274 NA or HA subtype levels provided the best fits to data. The lack of support for the no-imprinting model  
275 suggests that imprinting from the first exposure shapes lifelong seasonal influenza risk, just as it does  
276 avian-origin influenza (10, 12). However, imprinting appears to act more narrowly against seasonal  
277 influenza than against avian influenza, providing cross protection only to a specific NA or HA subtype,  
278 instead of broader, HA group-level protection. This result is consistent with the idea that

279 immunodominance of variable HA epitopes limits the breadth of immune cross protection deployed  
 280 against familiar, seasonal influenza subtypes (20,22).

281 As expected (see *Fig. 1G-I*), predictions from the two best models were highly collinear, except  
 282 in their risk predictions among middle-aged, H2N2-imprinted cohorts (birth years 1957-1968), and some  
 283 other minor differences arising from normalization across birth-years.

284

285

286

287 **Table 2.**

| Model                 | AN                                | AS               | AG               | A                |
|-----------------------|-----------------------------------|------------------|------------------|------------------|
| $\Delta$ AIC          | 0.00                              | 34.54            | 249.06           | 385.42           |
| H1N1 impr. protection | 0.36 (0.30-0.44)                  | 0.29 (0.24-0.35) | 0.65 (0.56-0.76) |                  |
| H3N2 impr. protection | 0.66 (0.58-0.76)                  | 0.90 (0.78-1.04) | 0.70 (0.62-0.82) |                  |
| Ages 0-4              | Reference group: Value fixed to 1 |                  |                  |                  |
| Ages 5-10             | 0.67 (0.62-0.73)                  | 0.65 (0.60-0.70) | 0.65 (0.60-0.71) | 0.61 (0.56-0.66) |
| Ages 11-17            | 0.33 (0.30-0.37)                  | 0.30 (0.28-0.34) | 0.32 (0.30-0.36) | 0.29 (0.27-0.33) |
| Ages 18-24            | 0.37 (0.34-0.42)                  | 0.34 (0.32-0.38) | 0.37 (0.34-0.42) | 0.34 (0.31-0.38) |
| Ages 25-31            | 0.35 (0.32-0.40)                  | 0.33 (0.30-0.38) | 0.34 (0.32-0.38) | 0.32 (0.29-0.36) |
| Ages 32-38            | 0.3 (0.28-0.35)                   | 0.28 (0.26-0.32) | 0.3 (0.27-0.34)  | 0.27 (0.25-0.31) |
| Ages 39-45            | 0.25 (0.22-0.30)                  | 0.22 (0.20-0.26) | 0.25 (0.22-0.29) | 0.23 (0.21-0.26) |
| Ages 46-52            | 0.27 (0.24-0.30)                  | 0.22 (0.20-0.26) | 0.26 (0.23-0.29) | 0.24 (0.22-0.28) |
| Ages 53-59            | 0.25 (0.23-0.30)                  | 0.22 (0.20-0.26) | 0.23 (0.21-0.27) | 0.23 (0.20-0.26) |
| Ages 60-66            | 0.27 (0.24-0.30)                  | 0.29 (0.26-0.33) | 0.24 (0.22-0.28) | 0.23 (0.21-0.27) |
| Ages 67-73            | 0.37 (0.33-0.43)                  | 0.42 (0.37-0.48) | 0.34 (0.30-0.38) | 0.33 (0.30-0.38) |
| Ages 74-80            | 0.57 (0.50-0.64)                  | 0.64 (0.57-0.74) | 0.52 (0.46-0.59) | 0.5 (0.46-0.57)  |
| Ages 81+              | 0.99 (0.88-1.11)                  | 1.12 (1.00-1.26) | 0.9 (0.81-1.01)  | 0.87 (0.80-0.96) |

288

289 **Maximum likelihood parameter estimates and 95% profile confidence intervals from each**

290 **model fit.** All estimated parameters represent the relative risk of a confirmed case, given the  
 291 factors listed in the left-hand column. Age-specific risk parameters could take any value, but we  
 292 only considered imprinting protection values between 0 and 1, as it would be illogical for  
 293 protective imprinting to cause an increase in relative risk. Model name abbreviations specific  
 294 which factors were included. A = age-specific risk after normalizing to demographic age  
 295 distribution, N = NA subtype-level imprinting, S = HA subtype-level imprinting, G = HA group-  
 296 level imprinting.

297

298

## 299 **Fitted risk patterns**

300 Fitted age-specific risk curves took similar forms in all tested models. After controlling for  
301 demographic age distribution, estimated age-specific risk was highest in children and the elderly,  
302 consistent with the buildup of immune memory across childhood, and waning immune function in the  
303 aged (**Fig. 3A** shows the fitted curve from the best model). Estimates of imprinting parameters were less  
304 than one, indicating some reduction in relative risk (**Table 2**). Within the best model, estimated reductions  
305 in relative risk from childhood imprinting were stronger for H1N1 (0.34, 95% CI 0.29-0.42) than for  
306 H3N2 (0.71, 95% CI 0.62-0.82). In the second-best model, AS (subtype-specific imprinting), estimated  
307 reductions in H3N2 risk were particularly weak, and the confidence interval overlapped the null value of  
308 1. **Table 2** shows parameter estimates and 95% profile confidence intervals from all models fitted.

309

310

## 311 **Effect of evolutionary rate**

312 To test for effects of evolutionary rate on epidemic age distribution, we searched for decreases in  
313 the proportion of cases among children in seasons associated with antigenic novelty, when highly drifted  
314 strains might be more able to infect immunologically experienced adults. (We defined children as ages 0-  
315 10, and verified internally that our analysis of evolutionary rate was insensitive to our exact choice of age  
316 range for children). Consistent with this expectation, the data showed a slight negative but not significant  
317 association between annual antigenic advance and the fraction of H3N2 cases observed in children (**Fig.**  
318 **4A**). However, note that no clear relationship emerged between antigenic novelty and the fraction of cases  
319 observed in any age group including older children (>10) and adults (**Fig. 4A**). These are the cohorts in  
320 which epidemiological data show the clearest differences between H1N1 and H3N2's age-specific  
321 impacts (**Fig. 2**); if rate of antigenic evolution is a dominant driver of age-specific differences in  
322 incidence, we would have expected to see clearer evidence of evolutionary rate effects within adults  
323 cohorts, not just between adults and the youngest children. The data contained too few influenza seasons

324 with sufficient numbers of confirmed H1N1 cases to support meaningful Spearman correlation  
325 coefficients for either pre-2009 or post-2009 seasonal H1N1 lineages.

326 Furthermore, if evolutionary rate is the dominant driver of subtype-specific differences in  
327 epidemic age distribution, then when subtypes H1N1 and H3N2 show similar degrees of annual antigenic  
328 advance, their age distributions of cases should appear more similar. However, the data showed that  
329 differences in H1N1 and H3N2's age-specific impacts did not converge when lineages showed similar  
330 annual advance. When comparing the fraction of cases observed in specific age classes, H1N1 data  
331 consistently clustered separately from H3N2, with H1N1 consistently causing fewer cases at the extremes  
332 of age (children 0-10 and elderly adults 71-85), but more cases in middle-aged adults, regardless of  
333 antigenic novelty (*Fig. 4A*). Smoothed density plots showed no clear relationship between annual  
334 antigenic advance and age distribution (*Fig. 4B*). Overall, the data showed a weak, but not significant  
335 signal that relatively severe, clinically attended cases may be more restricted to young children when  
336 antigenic novelty is low, but the data did not show strong evidence that the magnitude of annual antigenic  
337 drift is a systematic driver of epidemic age distribution across the entire population.

338

339

340

## Discussion

341 We analyzed a large epidemiological surveillance dataset and found that seasonal influenza  
342 subtypes H1N1 and H3N2 cause different age distributions of relatively severe, clinically attended cases,  
343 confirming previously reported patterns (12–14). We analyzed several possible drivers of these  
344 differences side-by-side, and found the greatest support for imprinting protection against seasonal  
345 influenza viruses of the same NA or HA subtype as the first influenza strain encountered in childhood  
346 (12,13). The data did not support strong effects from broader HA group-level imprinting, as recently  
347 detected for novel zoonotic or pandemic viruses (9,11), or from differences in rates of antigenic evolution  
348 (30). Our results suggest individuals retain a lifelong bias in immune memory, and that this imprint is not  
349 erased even after decades of exposure to or vaccination against dissimilar influenza subtypes.

350 External evidence corroborates the idea that birth year, rather than age, drives subtype-specific  
351 differences in seasonal influenza risk. When H3N2 first emerged in 1968, it caused little or no excess  
352 mortality in the elderly, who had putatively been exposed, as children or young adults, to an H3 virus that  
353 had circulated in the late 1800s (7,9). Meanwhile, H1N1-imprinted cohorts (those ~10-50 years old at the  
354 time) experienced considerable excess mortality in the 1968 pandemic (7). Now, fifty years later, the  
355 same H1N1-imprinted cohorts continue to experience excess H3N2 morbidity and mortality as older  
356 adults (12–14,29) (**Fig. 2**).

357 In model comparison, the data supported childhood imprinting to NA. Although NA is not as  
358 intensively studied as HA, these results emphasize the increasingly recognized importance of both  
359 antigens as drivers of protection against seasonal influenza (15–17). Realistically, some combination of  
360 effects from both HA and NA subtype-level imprinting probably shapes seasonal influenza risk; both  
361 models of imprinting produced similar fits to data, and far outperformed other models in terms of AIC  
362 (Fig. 3). Unfortunately, due to the limited diversity of seasonal influenza strains that have circulated in  
363 humans over the past century, collinearities between even the relatively simple models tested here  
364 prevented us from testing more complicated models of combined effects from imprinting to multiple

365 antigens. Deeper insights into the respective roles of HA and NA will most likely need to come from  
366 focused immunological cohort studies, in which individual histories of influenza infection are recorded  
367 and can be studied alongside changes in serology, PBMCs, and/or the B cell repertoire (33).

368 Alternatively, the development of immunological biomarkers for diagnosis of imprinting status in  
369 individual patients could substantially increase the power of epidemiological inference.

370 We did not detect a clear relationship between annual antigenic advance and epidemic age  
371 distribution, although small sample sizes may have limited our statistical power. We did detect a weak  
372 trend, consistent with the idea that influenza cases are more restricted to immunologically inexperienced  
373 children in seasons of low antigenic advance, as previously proposed (30). But the data did not reveal a  
374 clear relationship between antigenic advance and the fraction of cases occurring in adult age groups,  
375 where epidemiological data reveal distinct subtype-specific differences in impact. Perhaps antigenic  
376 advance shapes how cases are distributed between children and adults, but has small or inconsistent  
377 impacts within the adult population. We speculate that clearer relationships between antigenic advance  
378 and epidemic age distribution might emerge if methods to estimate antigenic distance were able to  
379 incorporate effects such as immune history (40), glycosylation (40,41), and immunity to antigens other  
380 than HA (16,17,42).

381 The exact immunological drivers of imprinting protection against seasonal influenza remain  
382 unclear, but these results provide some new clues. Traditionally, within-subtype cross-protection is  
383 thought to decay quickly with antigenic drift. Strains that circulated more than 14 years apart rarely show  
384 measurable cross-protective titers by the hemagglutination inhibition (HI) assay (38). The short timescale  
385 of immune memory to variable HA head epitopes stands in contrast to patterns observed in our study and  
386 others (12–14), where within-subtype immune memory imprinted in childhood appears to persist for an  
387 entire human lifetime, remaining evident even in the oldest cohorts. We speculate that within-subtype  
388 imprinting protection may involve epitopes that are more conserved, and stable over time, than those  
389 typically measured in HI assays (which inform most existing estimates of antigenic distance, but may  
390 disproportionately measure antibodies to variable, immunodominant epitopes on the HA head (21,22)).



391 Across a lifetime of exposures to diverse H1N1 and H3N2 variants, repeated back-boosting of antibodies  
392 to intermediately conserved sites on HA or NA (i.e. sites conserved within but not across HA and NA  
393 subtypes), could explain the longevity of subtype-level imprinting protection. This is consistent with  
394 recent evidence that the immune repertoire shifts to focus on more conserved influenza epitopes as we age  
395 (25,26).

396 Another possibility is that, memory B cell clones developed during the first childhood influenza  
397 exposure may later adapt via somatic hypermutation to “follow” antigenic targets as they drift over time  
398 (25,28). However, this would be inconsistent with new evidence suggesting memory B cells are relatively  
399 fixed in phenotype, and have little potential for ongoing affinity maturation (43,44). Thus, the first  
400 influenza exposure in life may fill a child's memory B cell repertoire with clones that serve in the future  
401 as prototypes that can be rapidly and effectively tailored to recognize drifted influenza strains of the same  
402 subtype. Finally, the role of CD4+ T cells in imprinting is unclear, but T cell memory and T cell help to B  
403 cells within germinal centers both play at least some role in the development of the immune repertoire  
404 (45).

405 Signals of imprinting protection are anomalously strong in the current cohort of elderly adults, as  
406 reflected by higher estimates of imprinting protection to H1N1 than H3N2. The oldest subjects in our  
407 data, born slightly after 1918, and would not have encountered an influenza virus of any subtype other  
408 than H1N1 until roughly age 30. Repeated early-life exposures to diverse H1N1 variants may have  
409 reinforced and expanded the breadth of H1N1-specific immune memory (5,46). But this strong H1N1  
410 protection seems to come at a cost; even after decades of seasonal H3N2 exposure, and vaccination, older  
411 cohorts have evidently failed to develop equally strong protection against H3N2. HA group 1 antigens  
412 (e.g. H1) appear to induce narrower immune responses, and less cross-group protection than structurally  
413 distinct HA group 2 antigens (e.g. H3) (23). Perhaps elderly cohorts imprinted to group 1 antigens have  
414 been trapped in narrower responses that offer exceptional protection against strains similar to that of first  
415 exposure but relatively poor adaptability to other subtypes.

416 We speculate that imprinting protection, which currently limits the number of severe, clinically-  
417 attended H1N1 cases in the elderly, also limits the mortality impact of H1N1 viruses. Although pre- and  
418 post- 2009 H1N1 lineages have caused slightly different profiles of age-specific mortality (13), neither  
419 H1N1 lineage causes nearly as many deaths as H3N2 in high-risk elderly cohorts (13,29,47). On the one  
420 hand, if strong subtype-specific biases from imprinting remain in future cohorts of elderly adults, our  
421 results would corroborate the idea that mortality from H1N1 may increase as protection in the elderly  
422 shifts from H1N1 toward other subtypes (9,13). On the other hand, given that cohorts born after 1968  
423 have had much more varied early life exposures to both H1N1 and H3N2, these cohorts may show a  
424 greater ability to act as immunological generalists as they become elderly, capable of effective defense  
425 against multiple subtypes.

426 Our study has several limitations. Relatively severe, clinically attended cases are much more  
427 likely to be detected, confirmed to subtype, and included in our data than mild cases. Thus, while our  
428 results show a clear relationship between subtype-level imprinting and risk of relatively severe, clinically  
429 attended influenza, the relationship between imprinting and mild or asymptomatic cases could not be  
430 determined from available data.

431 Given the limited number of variables recorded in the data, we could not model explicitly the  
432 impact of individual risk factors such as the presence of comorbidities, patient sex, or vaccination status.  
433 All these factors are known to shape immunity and influenza risk (48), and all may cause individual  
434 imprinting outcomes to vary from the average, population trends measured by our study. Understanding  
435 how these patient-level covariates modulate imprinting and other aspects of immunity is the next frontier  
436 in this line of research. For now, working within the constraints of the available data, we designed the  
437 age-specific risk component of the model to capture empirically the combined effects of several risk  
438 factors that could not be modeled individually. Additionally, we analyzed the relative count of H1N1 to  
439 H3N2 cases within each single year of birth, not absolute incidence, to control for minor age-specific  
440 biases in sampling, which are almost inevitably present in any large data set.

441 Another limitation was the low number of confirmed cases available in the pre-2009 era. Large,  
442 detailed data sets collected continuously over decades provide the greatest power to separate the effects of  
443 age from birth year. We emphatically echo earlier calls (49) for more systematic sharing of single year-of-  
444 age influenza surveillance data, standardization of sampling effort, and reporting of age-specific  
445 denominators, which could substantially boost the scientific community's ability to link influenza's  
446 genetic and antigenic properties with epidemiological outcomes. Additionally, collection and reporting of  
447 covariates such as sex, vaccination status and the presence of comorbidities in surveillance data would  
448 help us understand how patient-level variables modulate imprinting, and immunity in general (50,51).

449 Altogether, this analysis confirms that the epidemiological burden of H1N1 and H3N2 is shaped  
450 by cohort-specific differences in childhood imprinting (9,12,13,52), and that this imprinting acts at the  
451 HA or NA subtype level against seasonal influenza. The lack of support for broader, HA group-level  
452 imprinting effects emphasizes the consequences of immunodominance of influenza's most variable  
453 epitopes, and the difficulty of deploying broadly protective memory B cell responses against familiar,  
454 seasonal strains. Overall, these findings advance our understanding of how antigenic seniority shapes  
455 cohort-specific risk during epidemics. The fact that elderly cohorts show relatively weak immune  
456 protection against H3N2, even after living through decades of seasonal exposure to or vaccination against  
457 H3N2, suggests that antibody responses acquired in adulthood do not provide the same strength or  
458 durability of immune protection as responses primed in childhood. Immunological experiments that  
459 consider multiple viral exposures, and cohort studies in which individual histories of influenza infection  
460 are tracked from birth, promise to illuminate how B cell and T cell memory develop across a series of  
461 early life exposures. In particular, these studies may provide clearer insights than epidemiological data  
462 into which influenza antigens, epitopes and immune effectors play the greatest role in immune imprinting,  
463 and how quickly subtype-specific biases become entrenched across the first or the first few exposures.

464

465

466  
467  
468  
469  
470  
471  
472  
473  
474  
475  
476  
477  
478  
479  
480  
481  
482  
483  
484  
485  
486  
487  
488  
489  
490

## Materials and Methods

### Estimation of age from birth year in ADHS data

The data contained three variables, influenza season, birth year and confirmed subtype. For most cases, birth year was extracted directly from the reported date of birth in patient medical records, but age was not known. We estimated patient age at the time case observation using the formula [year of observation]-[birth year]. To ensure that the minimum estimated age was 0, the second year in the influenza season of case observation was considered the calendar year of observation (e.g. 2013 for the 2012-2013 season).

### Splines

In *Figure 2*, smoothing splines were fit to aid visual interpretation of noisy data. We fit splines using the command `smooth.spline(x = AGE, y = FRACTIONS, spar = 0.8)` in R version 3.5.0. Variables *AGE* and *FRACTIONS* were vectors whose entries represented single years of age, and the fraction of cases observed in the corresponding age group. The smoothing parameter 0.8 was chosen to provide a visually smooth fit. Alternative smoothing parameter choices (0.6 & 1.0) are shown in *Figs. S1-S2*. Although the choice of smoothing parameter changed the shape of each fitted spline, qualitative differences between splines fitted to H1N1 or H3N2 were insensitive.

### Model formulation

For each unique season in which cases were observed, define  $p$  as a vector whose entries represent the expected probability that a randomly drawn H1N1 or a randomly drawn H3N2 case was observed in an individual born in year  $b$ . Each model defined,  $p$  as a linear combination of age-specific risk, birth year-specific risk (i.e. imprinting effects). All tested models were nested within the equation:

$$p = DA * \mathbf{1}_{H1N1}(I_{H1N1}) * \mathbf{1}_{H3N2}(I_{H3N2}) \quad \mathbf{1}$$

491

492 To include risk factors that only modulated risk from one subtype, we included indicator  
493 functions  $I_{H1N1}$  and  $I_{H3N2}$ , which took value 1 if  $p$  described the expected age distribution of H1N1 or  
494 H3N2 cases, respectively, and 0 otherwise.

495

496

#### 497 ***Demographic age distribution (D)***

498 The population of Arizona aged slightly across the study period, so we controlled for shifting  
499 demography in all tested models. Demographic age distribution was obtained from intercensal estimates  
500 of total population (both sexes) for the state of Arizona, based on the 2000 and 2010 census (53). The US  
501 Census Bureau reports population estimates for ages 0-84, but only provides an aggregate estimate for  
502 ages 85+. We impute the number of individuals in each single year of age over 85 using a linear model fit  
503 to data on age 75-84, with a minimum threshold of 1000 individuals per single year of age. State-specific  
504 population estimates were not available prior to the 2000 census, so we substituted estimates from the  
505 year 2000 for cases observed in the 1993-94, and the 1994-95 seasons. Vector  $D$  represented the fraction  
506 of the total population at the time of case observation that fell in a given birth year.

507

#### 508 ***Age-specific risk (A)***

509 Age-specific risk was defined as a step function, in which relative risk was fixed to value 1 in an  
510 arbitrarily chosen age bin, and then  $z-1$  free parameters, denoted  $r_2$  to  $r_z$ , were fit to describe relative risk  
511 in all other age bins. Below,  $I_i$  are indicator functions specifying whether each vector entry is a member  
512 of age bin  $i$ .

$$513 \quad A = \mathbf{1}_1 + \mathbf{1}_2 r_2 + \cdots + \mathbf{1}_z r_z \quad 2$$

514

515 To obtain the predicted fraction of cases observed in each single year of birth, we normalized so  
516 that the product of vectors representing demographic age distribution, and age-specific risk, ( $DA$  in

517 equation 1) summed to 1. Thus, vector  $DA$  can be interpreted as the expected distribution of cases of any  
518 influenza case (either subtype), in the absence of birth year-specific biases from imprinting.

519

### 520 ***Imprinting (I)***

521 An indicator function defined whether a given prediction vector described risk of confirmed  
522 H1N1 or H3N2. Let  $f_{IHxNy}$  be vectors describing the fraction of cases of each birth year that were protected  
523 against strain  $HxNy$  by their childhood imprinting. We defined  $r_{IHxNy}$  as free parameters describing the risk  
524 of confirmed  $HxNy$ , given imprinting protection. Finally, the factor describing the effect of imprinting (I)  
525 was defined as:

526

$$527 \quad I_{HxNy} = \mathbf{1}_{HxNy} * [f_{IHxNy} r_{IHxNy} + (1 - f_{IHxNy})] \quad 3$$

528

529

### 530 **Likelihood**

531 We used equations 1-3 to generate predicted case age distributions ( $p$ ) for each influenza season  
532 (s) in which cases were observed in the data. Then, the likelihood was obtained as a product of  
533 multinomial densities across all seasons. If  $n_s$  represents the total number of cases observed in a given  
534 season,  $x_{0s}, \dots, x_{ms}$  each represent the number of cases observed in each single year of birth, and if  
535  $p_{0s} \dots p_{ms}$  each represent entries in the model's predicted birth year-distribution of cases, then the  
536 likelihood is given by:

537

$$538 \quad \mathcal{L} = \prod_s \frac{n_s!}{x_{0s}! \dots x_{ms}!} p_{0s}^{x_{0s}} \dots p_{ms}^{x_{ms}} \quad 4$$

539

540

541

## 542 **Model fitting and model comparison**

543 We fit models containing all possible combinations of the above factors to influenza data from  
544 each season in the data. We simultaneously estimated all free parameter values using the `optim()` function  
545 in R, with method L-BFGS-B. Imprinting parameters could take values in  $[0,1]$ , representing the  
546 possibility of a reduction in risk. Age-specific risk parameters could take any value greater than 0. We  
547 calculated likelihood profiles and 95% profile confidence intervals for each free parameter. Confidence  
548 intervals were defined using the method of likelihood ratios (34).

549

## 550 **Antigenic advance**

551 We obtained antigenic distance estimates from *Nextstrain* ([nextstrain.org](http://nextstrain.org)) (36,54), and from  
552 source data from Figure 3 in Bedford et al. (38). *Nextstrain* calculates antigenic distance using genetic  
553 data from GISAID (55), and using methods described by Neher et al. (37). We analyzed “CTiter”  
554 estimates from *Nextstrain*, which correspond to Neher et al.’s “tree model” method, and are most directly  
555 comparable to pre-2009 H1N1 estimates from (38). We repeated analyses using estimates from the  
556 similar “substitution model” method and verified that our choice of antigenic distance metric did not  
557 meaningfully impact our results. The negative Spearman correlation between antigenic advance and  
558 proportion of cases in children was lower, but still non-significant when using the substitution model  
559 ( $p=0.06$ ); all other differences were unremarkable. Datasets from *Nextstrain* and Bedford et al. both  
560 contained redundant antigenic distance estimates for the H3N2 lineage, but only Bedford et al. analyzed  
561 the pre-2009 H1N1 lineage, and only *Nextstrain* data analyzed the post-2009 H1N1 lineage. The antigenic  
562 distance estimates reported by Bedford et al. were roughly proportional to those reported on *Nextstrain*,  
563 but greater in absolute magnitude (37). To enable visualization of all three lineages on the same plot axes,  
564 we rescaled pre-2009 H1N1 estimates from Bedford et al. using the formula  $d_{Nextstrain} = 0.47d_{Bedford}$ . The  
565 scaling factor was chosen so that directly-comparable H3N2 distance estimates obtained using each  
566 method spanned the same range (**Fig. S3**). The *Nextstrain* data files used in this analysis are archived  
567 within our analysis code.

568  
569  
570  
571  
572  
573  
574  
575  
576  
577  
578  
579  
580  
581  
582  
583  
584  
585  
586  
587  
588  
589  
590

## Acknowledgements

We are grateful to Ken Komatsu and Kristen Herrick for their assistance with data access, and to Trevor Bedford for assistance accessing and interpreting antigenic distance data from *Nextstrain*. We thank Lone Simonsen for helpful discussions. KG was supported by the National Institutes of Health (F31AI134017, T32-GM008185). JLS was supported by NSF grants OCE-1335657 and DEB-1557022, SERDP RC-2635, and DARPA PREEMPT D18AC00031. MW was supported by the David and Lucile Packard Foundation. The funders had no role in study design, data collection and analysis, decision to publish, or preparation of the manuscript.

## Code and data availability

Code to perform all reported analyses and construct all plots, and all relevant data (Arizona surveillance data and relevant antigenic advance data) is archived at <https://zenodo.org/badge/latestdoi/160883450>.

## Disclaimer

This work does not necessarily represent the views of the US government or the NIH.

## Competing interests

The authors declare no competing interests.

## Ethics Statement

This study analyzed only existing epidemiological data, which was completely anonymized.



591  
592  
593  
594  
595  
596  
597  
598

## **Author contributions**

MW, KG and JLS conceived of the questions and modeling analysis. CV and MW provided crucial assistance with data access and study design. SB and RB supervised data curation and advised the modeling arm of our team about compatibility between the data and analysis strategy. KG wrote the code and performed analyses, with supervision from JLS, and drafted the manuscript. All authors provided input on analysis and interpretation of the results, and helped revise and edit the manuscript text.

599

## References

- 600 1. Francis T. On the Doctrine of Original Antigenic Sin. *Proc Am Philos Soc.* 1960;104(6):572–8.
- 601 2. Lessler J, Riley S, Read JM, Wang S, Zhu H, Smith GJD, et al. Evidence for Antigenic Seniority in  
602 Influenza A (H3N2) Antibody Responses in Southern China. *PLOS Pathog.* 2012 Jul  
603 19;8(7):e1002802.
- 604 3. Henry C, Palm A-KE, Krammer F, Wilson PC. From Original Antigenic Sin to the Universal  
605 Influenza Virus Vaccine. *Trends Immunol.* 2018;39(1):70–9.
- 606 4. Xu R, Ekiert DC, Krause JC, Hai R, Crowe JE, Wilson IA. Structural Basis of Preexisting Immunity  
607 to the 2009 H1N1 Pandemic Influenza Virus. *Science.* 2010 Apr 16;328(5976):357–60.
- 608 5. Hancock K, Veguilla V, Lu X, Zhong W, Butler EN, Sun H, et al. Cross-Reactive Antibody  
609 Responses to the 2009 Pandemic H1N1 Influenza Virus. *N Engl J Med Boston.* 2009 Nov  
610 12;361(20):1945–52.
- 611 6. Simonsen L, Spreeuwenberg P, Lustig R, Taylor RJ, Fleming DM, Kroneman M, et al. Global  
612 Mortality Estimates for the 2009 Influenza Pandemic from the GLaMOR Project: A Modeling  
613 Study. *PLOS Med.* 2013 Nov 26;10(11):e1001558.
- 614 7. Simonsen L, Reichert TA, Miller MA. The virtues of antigenic sin: consequences of pandemic  
615 recycling on influenza-associated mortality. *Int Congr Ser.* 2004 Jun 1;1263:791–4.
- 616 8. Ma J, Dushoff J, Earn DJD. Age-specific mortality risk from pandemic influenza. *J Theor Biol.*  
617 2011 Nov 7;288:29–34.
- 618 9. Worobey M, Han G-Z, Rambaut A. Genesis and pathogenesis of the 1918 pandemic H1N1  
619 influenza A virus. *Proc Natl Acad Sci.* 2014 Jun 3;111(22):8107–12.
- 620 10. Gagnon A, Miller MS, Hallman SA, Bourbeau R, Herring DA, Earn DJD, et al. Age-Specific  
621 Mortality During the 1918 Influenza Pandemic: Unravelling the Mystery of High Young Adult  
622 Mortality. *PLoS ONE.* 2013 Aug 5;8(8).
- 623 11. Gostic KM, Ambrose M, Worobey M, Lloyd-Smith JO. Potent protection against H5N1 and H7N9  
624 influenza via childhood hemagglutinin imprinting. *Science.* 2016 Nov 11;354(6313):722–6.
- 625 12. Khiabani H, Farrell GM, George KS, Rabadan R. Differences in Patient Age Distribution  
626 between Influenza A Subtypes. *PLOS ONE.* 2009 Aug 31;4(8):e6832.
- 627 13. Budd AP, Beacham L, Smith CB, Garten RJ, Reed C, Kniss K, et al. Birth Cohort Effects in  
628 Influenza Surveillance Data: Evidence that First Influenza Infection Affects Later Influenza-  
629 Associated Illness. *J Infect Dis.*
- 630 14. Lemaitre M, Carrat F. Comparative age distribution of influenza morbidity and mortality during  
631 seasonal influenza epidemics and the 2009 H1N1 pandemic. *BMC Infect Dis.* 2010 Jun 9;10(1):162.
- 632 15. Huang QS, Bandaranayake D, Wood T, Newbern EC, Seeds R, Ralston J, et al. Risk Factors and  
633 Attack Rates of Seasonal Influenza Infection: Results of the Southern Hemisphere Influenza and

- 634 Vaccine Effectiveness Research and Surveillance (SHIVERS) Seroepidemiologic Cohort Study. *J*  
635 *Infect Dis.* 2019 Jan 9;219(3):347–57.
- 636 16. Cowling BJ, Sullivan SG. The Value of Neuraminidase Inhibition Antibody Titers in Influenza  
637 Seroepidemiology. *J Infect Dis.* 2019 Jan 9;219(3):341–3.
- 638 17. Memoli MJ, Shaw PA, Han A, Czajkowski L, Reed S, Athota R, et al. Evaluation of  
639 Antihemagglutinin and Antineuraminidase Antibodies as Correlates of Protection in an Influenza  
640 A/H1N1 Virus Healthy Human Challenge Model. *mBio.* 2016 Apr 19;7(2).
- 641 18. Wrammert J, Koutsonanos D, Li G-M, Edupuganti S, Sui J, Morrissey M, et al. Broadly cross-  
642 reactive antibodies dominate the human B cell response against 2009 pandemic H1N1 influenza  
643 virus infection. *J Exp Med.* 2011 Jan 17;208(1):181–93.
- 644 19. Pica N, Hai R, Krammer F, Wang TT, Maamary J, Eggink D, et al. Hemagglutinin stalk antibodies  
645 elicited by the 2009 pandemic influenza virus as a mechanism for the extinction of seasonal H1N1  
646 viruses. *Proc Natl Acad Sci U S A.* 2012;109(7):2573–8.
- 647 20. Krammer F. Novel universal influenza virus vaccine approaches. *Curr Opin Virol.* 2016 Apr;17:95–  
648 103.
- 649 21. Ng S, Nachbagauer R, Balmaseda A, Stadlbauer D, Ojeda S, Patel M, et al. Novel correlates of  
650 protection against pandemic H1N1 influenza A virus infection. *Nat Med.* 2019 Jun;25(6):962–7.
- 651 22. Andrews SF, Huang Y, Kaur K, Popova LI, Ho IY, Pauli NT, et al. Immune history profoundly  
652 affects broadly protective B cell responses to influenza. *Sci Transl Med.* 2015 Dec  
653 2;7(316):316ra192-316ra192.
- 654 23. Zost SJ, Wu NC, Hensley SE, Wilson IA. Immunodominance and Antigenic Variation of Influenza  
655 Virus Hemagglutinin: Implications for Design of Universal Vaccine Immunogens. *J Infect Dis.*  
656 2019 Apr 8;219(Supplement\_1):S38–45.
- 657 24. Grenfell BT, Pybus OG, Gog JR, Wood JLN, Daly JM, Mumford JA, et al. Unifying the  
658 Epidemiological and Evolutionary Dynamics of Pathogens. *Science.* 2004 Jan 16;303(5656):327–  
659 32.
- 660 25. Henry C, Zheng N-Y, Huang M, Cabanov A, Rojas KT, Kaur K, et al. Influenza Virus Vaccination  
661 Elicits Poorly Adapted B Cell Responses in Elderly Individuals. *Cell Host Microbe.* 2019  
662 Mar;25(3):357-366.e6.
- 663 26. Ranjeva S, Subramanian R, Fang VJ, Leung GM, Ip DKM, Perera RAPM, et al. Age-specific  
664 differences in the dynamics of protective immunity to influenza. *Nat Commun.* 2019 Apr  
665 10;10(1):1–11.
- 666 27. Miller MS, Gardner TJ, Krammer F, Aguado LC, Tortorella D, Basler CF, et al. Neutralizing  
667 Antibodies Against Previously Encountered Influenza Virus Strains Increase over Time: A  
668 Longitudinal Analysis. *Sci Transl Med.* 2013 Aug 14;5(198):198ra107-198ra107.
- 669 28. Tesini BL, Kanagaiah P, Wang J, Hahn M, Halliley JL, Chaves FA, et al. Broad Hemagglutinin-  
670 Specific Memory B Cell Expansion by Seasonal Influenza Virus Infection Reflects Early-Life  
671 Imprinting and Adaptation to the Infecting Virus. *J Virol.* 2019 Apr 15;93(8):e00169-19.

- 672 29. Thompson WW, Shay DK, Weintraub E, Brammer L, Cox N, Anderson LJ, et al. Mortality  
673 associated with influenza and respiratory syncytial virus in the United States. *JAMA*. 2003 Jan  
674 8;289(2):179–86.
- 675 30. Bedford T, Riley S, Barr IG, Broor S, Chadha M, Cox NJ, et al. Global circulation patterns of  
676 seasonal influenza viruses vary with antigenic drift. *Nature*. 2015 Jul;523(7559):217–20.
- 677 31. Arizona Department of Health Services. 2015–2016 Influenza Summary [Internet]. [cited 2019 May  
678 23]. Available from: [https://www.azdhs.gov/documents/preparedness/epidemiology-disease-  
679 control/flu/surveillance/2015-2016-influenza-summary.pdf](https://www.azdhs.gov/documents/preparedness/epidemiology-disease-control/flu/surveillance/2015-2016-influenza-summary.pdf)
- 680 32. National Notifiable Diseases Surveillance System, Division of Health Informatics and Surveillance,  
681 National Center for Surveillance, Epidemiology and Laboratory Services. MMWR Week Fact Sheet  
682 [Internet]. [cited 2019 May 23]. Available from:  
683 [https://wwwn.cdc.gov/nndss/document/MMWR\\_Week\\_overview.pdf](https://wwwn.cdc.gov/nndss/document/MMWR_Week_overview.pdf)
- 684 33. Erbeling EJ, Post DJ, Stemmy EJ, Roberts PC, Augustine AD, Ferguson S, et al. A Universal  
685 Influenza Vaccine: The Strategic Plan for the National Institute of Allergy and Infectious Diseases.  
686 *J Infect Dis*. 2018 Jul 2;218(3):347–54.
- 687 34. Bolker BM. *Ecological Models and Data in R*. Princeton University Press; 2008. 409 p.
- 688 35. Burnham KP, Anderson DR. *Model Selection and Multimodel Inference: A Practical Information-  
689 Theoretic Approach*. 2nd ed. New York: Springer-Verlag; 2002.
- 690 36. Hadfield J, Megill C, Bell SM, Huddleston J, Potter B, Callender C, et al. Nextstrain: real-time  
691 tracking of pathogen evolution. *Bioinformatics*. 2018 Dec 1;34(23):4121–3.
- 692 37. Neher RA, Bedford T, Daniels RS, Russell CA, Shraiman BI. Prediction, dynamics, and  
693 visualization of antigenic phenotypes of seasonal influenza viruses. *Proc Natl Acad Sci*. 2016 Mar  
694 22;113(12):E1701–9.
- 695 38. Bedford T, Suchard MA, Lemey P, Dudas G, Gregory V, Hay AJ, et al. Integrating influenza  
696 antigenic dynamics with molecular evolution. Losick R, editor. *eLife*. 2014 Feb 4;3:e01914.
- 697 39. Smith DJ, Lapedes AS, Jong JC de, Bestebroer TM, Rimmelzwaan GF, Osterhaus ADME, et al.  
698 Mapping the Antigenic and Genetic Evolution of Influenza Virus. *Science*. 2004 Jul  
699 16;305(5682):371–6.
- 700 40. Cobey S, Hensley SE. Immune history and influenza virus susceptibility. *Curr Opin Virol*. 2017 Feb  
701 1;22:105–11.
- 702 41. Linderman SL, Chambers BS, Zost SJ, Parkhouse K, Li Y, Herrmann C, et al. Potential antigenic  
703 explanation for atypical H1N1 infections among middle-aged adults during the 2013–2014  
704 influenza season. *Proc Natl Acad Sci*. 2014 Nov 4;111(44):15798–803.
- 705 42. Chen Y-Q, Wohlbold TJ, Zheng N-Y, Huang M, Huang Y, Neu KE, et al. Influenza Infection in  
706 Humans Induces Broadly Cross-Reactive and Protective Neuraminidase-Reactive Antibodies. *Cell*.  
707 2018 Apr 5;173(2):417-429.e10.

- 708 43. Andrews SF, Chambers MJ, Schramm CA, Plyler J, Raab JE, Kanekiyo M, et al. Activation  
709 Dynamics and Immunoglobulin Evolution of Pre-existing and Newly Generated Human Memory B  
710 cell Responses to Influenza Hemagglutinin. *Immunity*. 2019 Aug 20;51(2):398-410.e5.
- 711 44. Matsuda K, Huang J, Zhou T, Sheng Z, Kang BH, Ishida E, et al. Prolonged evolution of the  
712 memory B cell response induced by a replicating adenovirus-influenza H5 vaccine. *Sci Immunol*.  
713 2019 Apr 19;4(34):eaau2710.
- 714 45. Ramiscal RR, Vinuesa CG. T-cell subsets in the germinal center. *Immunol Rev*. 2013;252(1):146–  
715 55.
- 716 46. Rozo M, Gronvall GK. The Reemergent 1977 H1N1 Strain and the Gain-of-Function Debate. *mBio*.  
717 2015 Sep 1;6(4):e01013-15.
- 718 47. Dushoff J, Plotkin JB, Viboud C, Earn DJD, Simonsen L. Mortality due to Influenza in the United  
719 States—An Annualized Regression Approach Using Multiple-Cause Mortality Data. *Am J*  
720 *Epidemiol*. 2006 Jan 15;163(2):181–7.
- 721 48. Lewnard JA, Cobey S. Immune History and Influenza Vaccine Effectiveness. *Vaccines*. 2018  
722 Jun;6(2):28.
- 723 49. Gagnon A, Acosta E, Miller MS. Reporting and evaluating influenza virus surveillance data: An  
724 argument for incidence by single year of age. *Vaccine*. 2018 Oct 8;36(42):6249–52.
- 725 50. Klein SL, Flanagan KL. Sex differences in immune responses. *Nat Rev Immunol*. 2016  
726 Oct;16(10):626–38.
- 727 51. vom Steeg LG, Klein SL. Sex and sex steroids impact influenza pathogenesis across the life course.  
728 *Semin Immunopathol*. 2019 Mar 1;41(2):189–94.
- 729 52. Glezen WP, Keitel WA, Taber LH, Piedra PA, Clover RD, Couch RB. Age Distribution of Patients  
730 with Medically-Attended Illnesses Caused by Sequential Variants of Influenza A/H1N1:  
731 Comparison to Age-Specific Infection Rates, 1978–1989. *Am J Epidemiol*. 1991 Feb 1;133(3):296–  
732 304.
- 733 53. US Census Bureau. Index of program surveys, population estimates [Internet]. [cited 2019 Aug 21].  
734 Available from: <https://www2.census.gov/programs-surveys/popest/>
- 735 54. Sagulenko P, Puller V, Neher RA. TreeTime: Maximum-likelihood phylodynamic analysis. *Virus*  
736 *Evol*. 2018 Jan 8;4(1).
- 737 55. Bogner P, Capua I, Lipman DJ, Cox NJ. A global initiative on sharing avian flu data. *Nature*. 2006  
738 Aug;442(7106):981.

739

740

## Figure captions

741 **Figure 1. Model and expectations under different imprinting hypotheses.** (A) Reconstructed, birth  
742 year-specific probabilities of imprinting (representative example specific to cases observed in 2015).  
743 Throughout the manuscript, group 1 HA subtypes are represented in blue and group 2 subtypes in red. (B)  
744 Expected imprinting protection against H1N1 or H3N2 under the three tested models. (C) Cartoon of  
745 expected age distribution of any influenza case, before controlling for subtype-specific imprinting. The  
746 shape of this curve is purely hypothetical, but each of our tested models combined demographic age  
747 distribution with a fitted, age-specific risk step function to generate similar, data-driven curves. (D-F)  
748 Fraction of each birth year unprotected by their childhood imprinting (from A) determines the shape of  
749 birth year-specific risk. (G-I) A linear combination of age-specific risk (C), and birth year-specific risk  
750 (D-F) give the expected age distribution of H1N1 or H3N2 cases under each model.

751  
752 **Figure 2. Observed age distributions, Arizona.** Points show fraction of confirmed H1N1 or H3N2 cases  
753 observed in each single year of age. Lines show a smoothing spline fit to observed distributions. (A) All  
754 confirmed cases in the data (aggregate across all seasons). (B-G) Age distributions from individual  
755 seasons in which both H1N1 and H3N2 circulated (seasons with  $\geq 50$  confirmed cases of each subtype are  
756 shown here. See Fig. S1 for all seasons).

757  
758 **Figure 3. Model fits and model selection.** (A) Fitted effects of age, after normalization to demographic  
759 age distribution and (B) imprinting effects from model AN, which provided the best fit to data. (C-D)  
760 Model fits to observed age distributions of H1N1 (C) and H3N2 (D) cases. Model name abbreviations  
761 indicate which factors were included: A = age-specific risk, N = NA subtype-level imprinting, S = HA  
762 subtype-level imprinting, G = HA group-level imprinting. All models included demographic age  
763 distribution.

764  
765 **Figure 4. Effect of antigenic advance on age distribution.** (A) Relationship between annual antigenic  
766 advance and the fraction of cases observed in children (0-10), or in adult age groups. Each data point  
767 represents a single influenza season in which at least 100 confirmed cases of a given subtype were  
768 observed. Blue label shows Spearman correlation between the fraction of H3N2 cases observed in each  
769 age group and annual antigenic advance. Blue dashes show linear trend fitted using `lm()` in R. (B) Season-  
770 specific age distributions of cases, colored by antigenic advance since the previous season.

771

772

773

774

## Table legends

775 **Table 1. Confirmed cases in surveillance data from Arizona Department of Health Services.** Data  
776 representing the first and second waves of the 2009 H1N1 pandemic (2008-2009 and 2009-2010 seasons)  
777 were excluded.

778

779 **Table 2. Maximum likelihood parameter estimates and 95% profile confidence intervals from each  
780 model fit to ADHS data.** All estimated parameters represent the relative risk of a confirmed case, given  
781 the factors listed in the left-hand column. Model name abbreviations specific which factors were included.  
782 A = age-specific risk, N = NA subtype-level imprinting, S = HA subtype-level imprinting, G = HA group-  
783 level imprinting.

784

## Figures

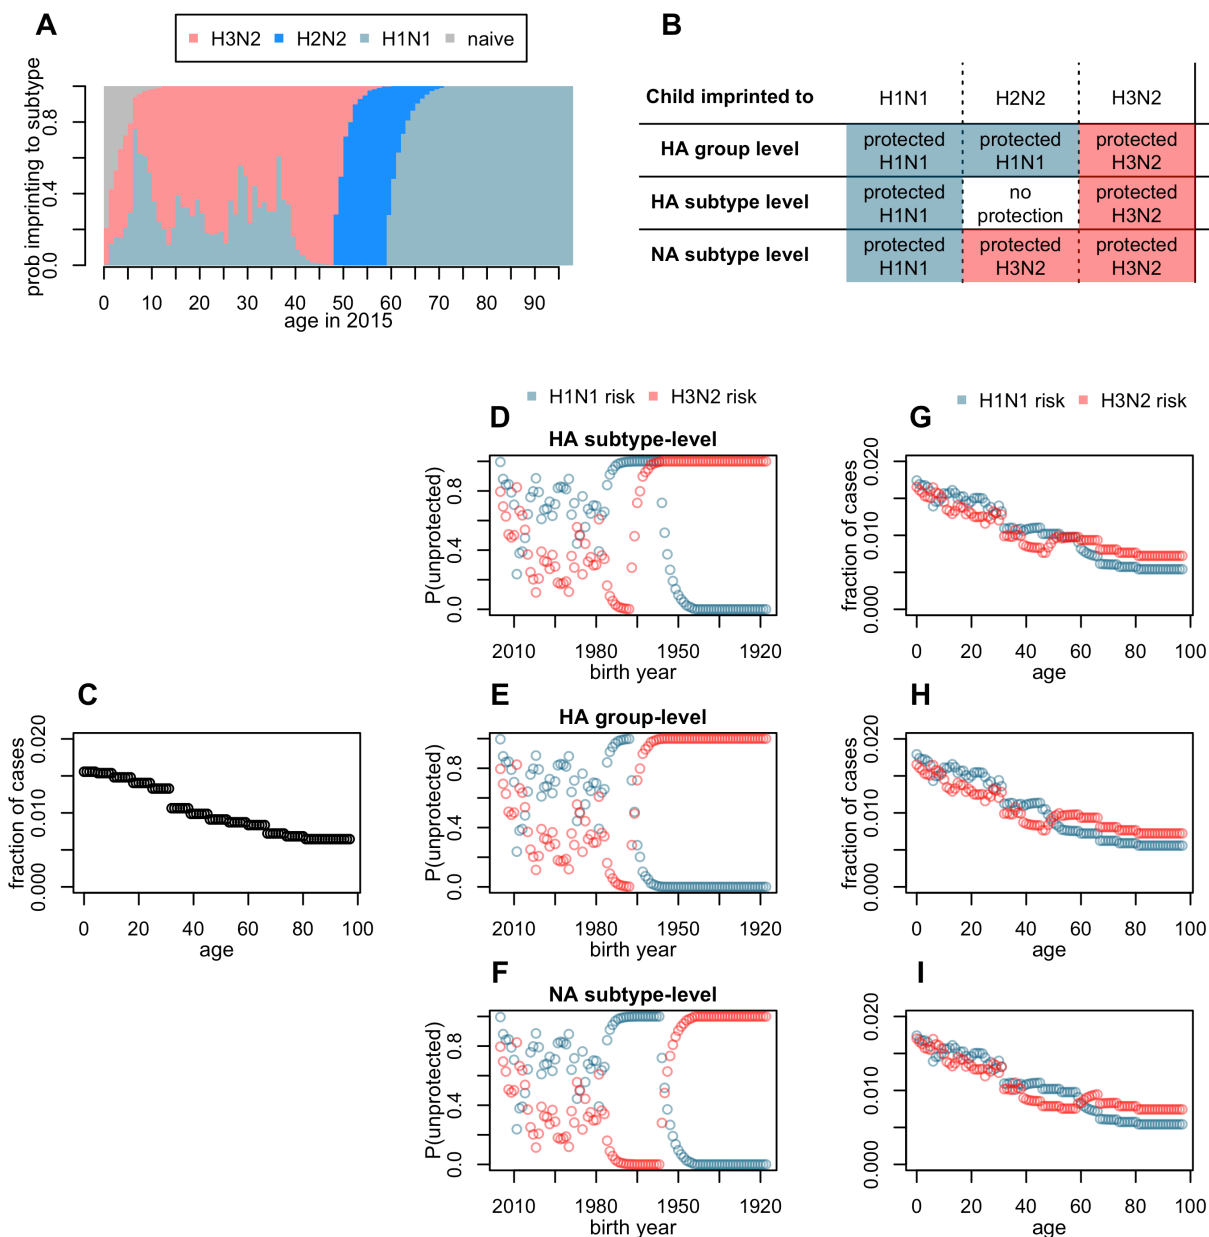

785

786 **Figure 1. Model and expectations under different imprinting hypotheses.** (A) Reconstructed, birth  
 787 year-specific probabilities of imprinting (representative example specific to cases observed in 2015).  
 788 Throughout the manuscript, group 1 HA subtypes are represented in blue and group 2 subtypes in red. (B)  
 789 Expected imprinting protection against H1N1 or H3N2 under the three tested models. (C) Cartoon of  
 790 expected age distribution of any influenza case, before controlling for subtype-specific imprinting. The  
 791 shape of this curve is purely hypothetical, but each of our tested models combined demographic age  
 792 distribution with a fitted, age-specific risk step function to generate similar, data-driven curves. (D-F)  
 793 Fraction of each birth year unprotected by their childhood imprinting (from A) determines the shape of  
 794 birth year-specific risk. (G-I) A linear combination of age-specific risk (C), and birth year-specific risk  
 795 (D-F) give the expected age distribution of H1N1 or H3N2 cases under each model.

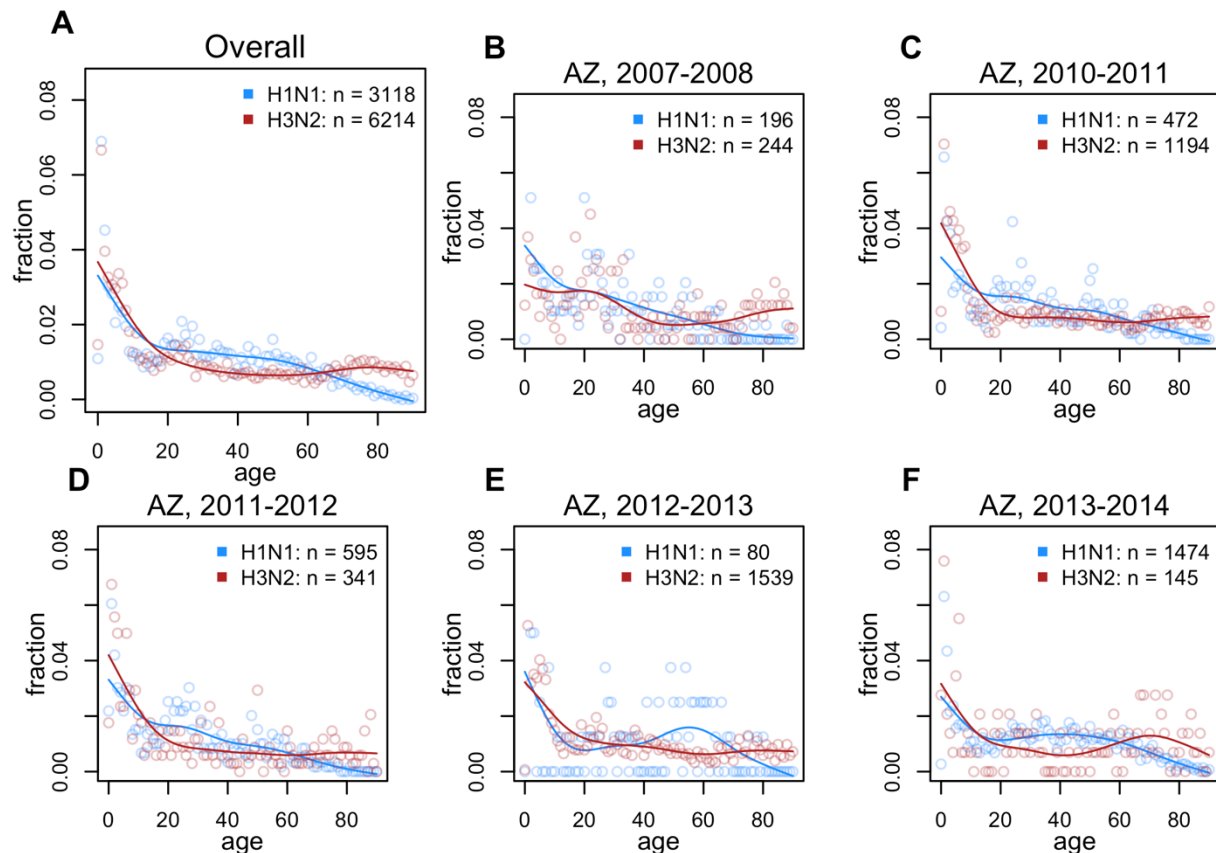

796  
797 **Figure 2. Observed age distributions, Arizona.** Points show fraction of confirmed H1N1 or H3N2 cases  
798 observed in each single year of age. Lines show a smoothing spline fit to observed distributions. (A) All  
799 confirmed cases in the data (aggregate across all seasons). (B-G) Age distributions from individual  
800 seasons in which both H1N1 and H3N2 circulated (seasons with  $\geq 50$  confirmed cases of each subtype are  
801 shown here. See Fig. S1 for all seasons).



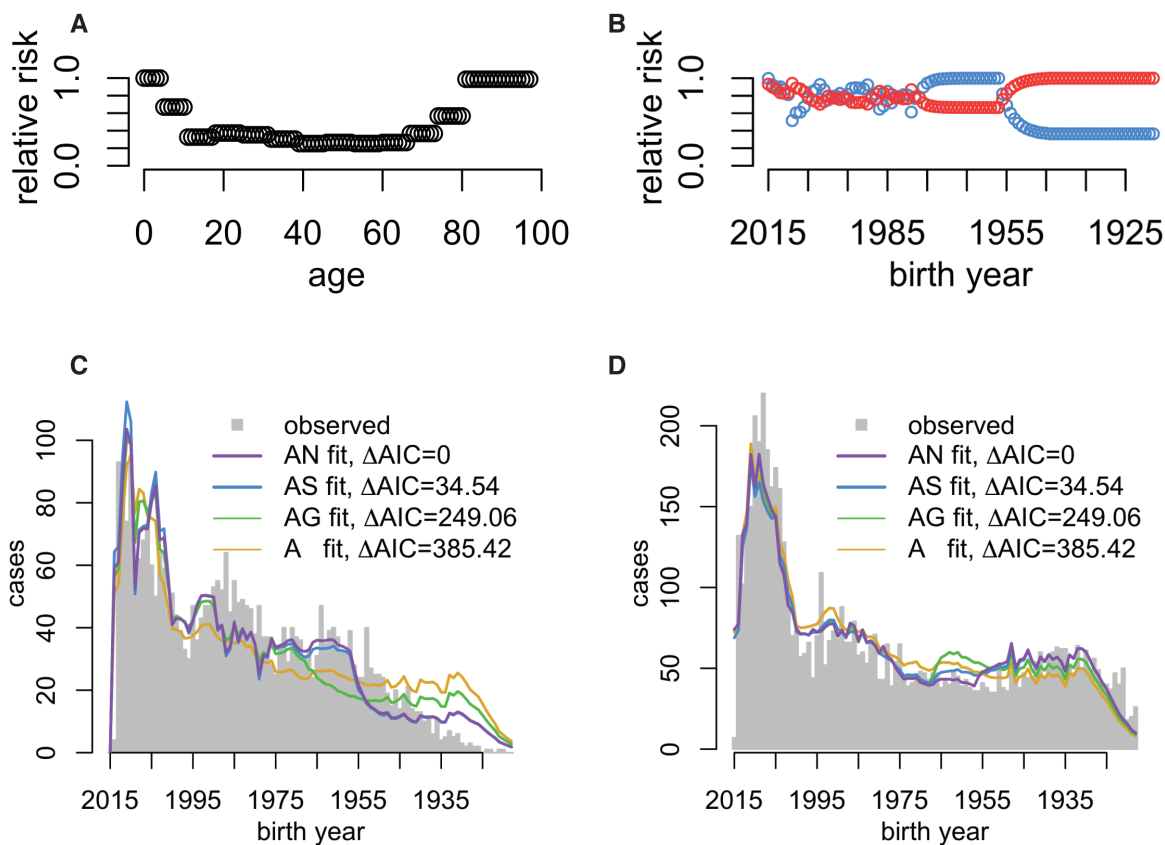

802  
803 **Figure 3. Model fits and model selection.** (A) Fitted effects of age, after normalization to demographic  
804 age distribution and (B) imprinting effects from model AN, which provided the best fit to data. (C-D)  
805 Model fits to observed age distributions of H1N1 (C) and H3N2 (D) cases. Model name abbreviations  
806 indicate which factors were included: A = age-specific risk, N = NA subtype-level imprinting, S = HA  
807 subtype-level imprinting, G = HA group-level imprinting. All models included demographic age  
808 distribution.

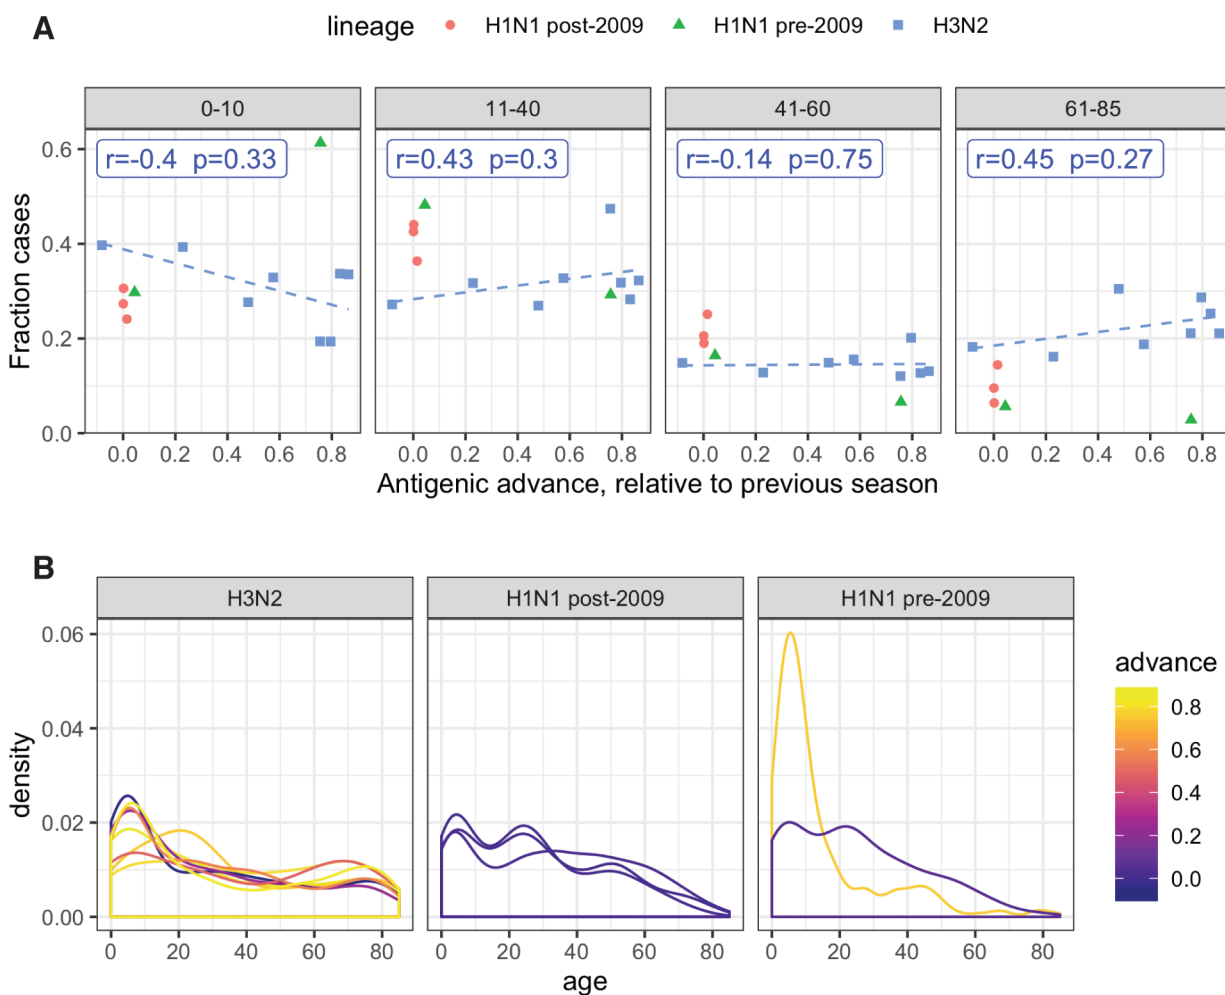

809

810 **Figure 4. Effect of antigenic advance on age distribution.** (A) Relationship between annual antigenic  
811 advance and the fraction of cases observed in children (0-10), or in adult age groups. Each data point  
812 represents a single influenza season in which at least 100 confirmed cases of a given subtype were  
813 observed. Blue label shows Spearman correlation between the fraction of H3N2 cases observed in each  
814 age group and annual antigenic advance. Blue dashes show linear trend fitted using `lm()` in R. (B) Season-  
815 specific age distributions of cases, colored by antigenic advance since the previous season.  
816
